# Supplementary material
Source: PubMed Central journal article supplement (PMC5218839)
Supplement: NIHMS633-supplement-supplementary_data.pdf [file NIHMS633-supplement-supplementary_data.pdf]

**CHEMBIOCHEM**

## Supporting Information

© Copyright Wiley-VCH Verlag GmbH & Co. KGaA, 69451 Weinheim, 2006

© Copyright Wiley-VCH Verlag GmbH & Co. KGaA, 69451 Weinheim, 2006

**CHEMBIOCHEM**

## Supporting Information

for

Fluorescent N<sup>2</sup>,N<sup>3</sup>-ε-Adenine Nucleoside and Nucleotide Probes:  
Synthesis, Spectroscopic Properties, and Biochemical Evaluation

Einat Sharon, Sébastien A. Lévesque, Mercedes N. Munkonda, Jean Sévigny,  
Denise Ecke, Georg Reiser, and Bilha Fischer\*

**D-7000 HPLC System Manager Report**

Analyzed: 05/04/05 09:01

Reported: 24/04/06 16:33

Processed: 05/04/05 09:22

Data Path: C:\WIN32APP\HSM\EINAT\DATA\1688\

Processing Method: flourecent adenine derivatives

System(acquisition): Org.Chem-1

Series:1688

Application: EINAT

Vial Number: 1

Sample Name: ATP,N2,N3 NH2

Vial Type: UNK

Injection from this vial: 1 of 1

Volume: 20.0 ul

Sample Description:

Absorbance Mode: NORMAL (2.0 AU)

Absorbance Scale: 2.000

Spectral Bandwidth: 4 nm

Spectral Interval: 1600 ms

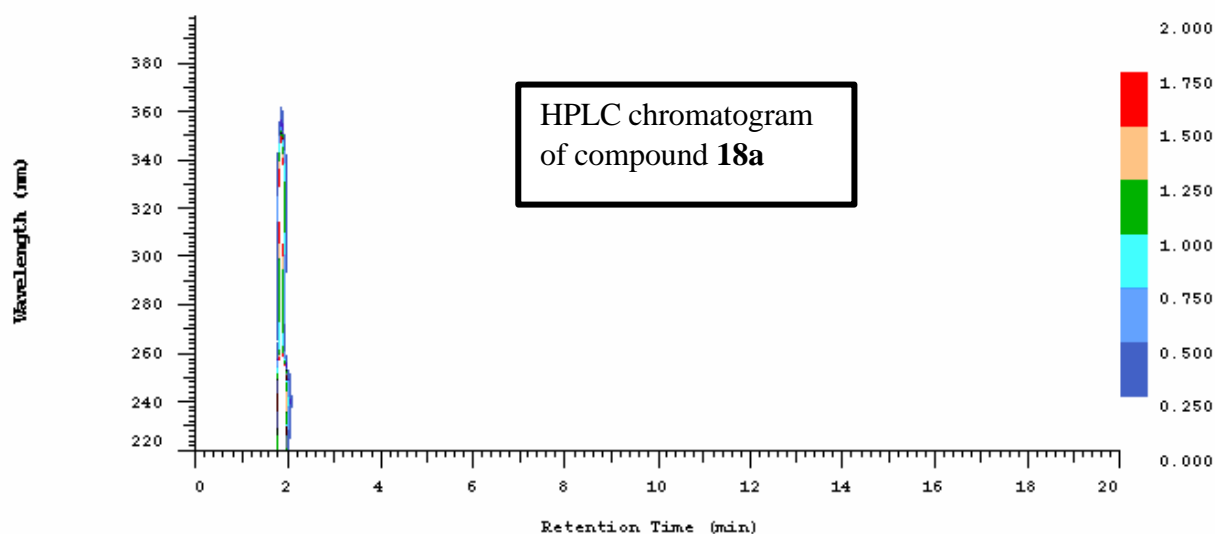

Chrom Type: Fixed WL Chromatogram, 270 nm

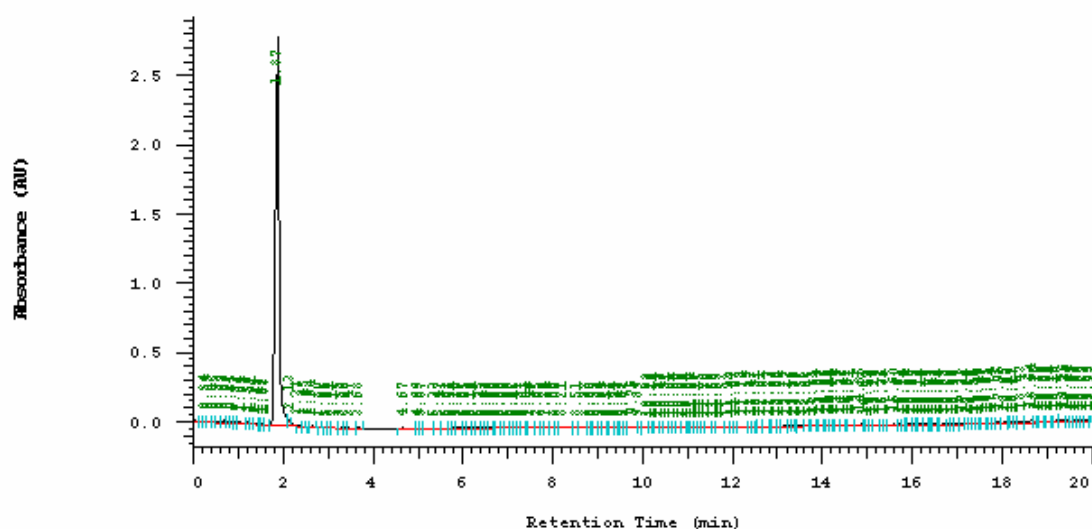

Acquisition Method: flourecent adenine derivatives

Column Type: LichroCART

Developed by: Avital

Pump A Type: L-6200

Solvent A: acetonitrile

Solvent B: TEAA

Method Description: 5mM TBAP in MeOH(A) amd 60 mM ammonium

**D-7000 HPLC System Manager Report**

Analyzed: 05/04/05 09:57

Reported: 24/04/06 16:47

Processed: 05/04/05 10:17

Data Path: C:\WIN32APP\HSM\EINAT\DATA\1690\

Processing Method: flourecent adenine derivatives

System(acquisition): Org.Chem-1

Series:1690

Application: EINAT

Vial Number: 1

Sample Name: AMP,N2,N3 NH2

Vial Type: UNK

Injection from this vial: 1 of 1

Volume: 20.0 ul

Sample Description:

Absorbance Mode: NORMAL (2.0 AU)

Absorbance Scale: 2.000

Spectral Bandwidth: 4 nm

Spectral Interval: 1600 ms

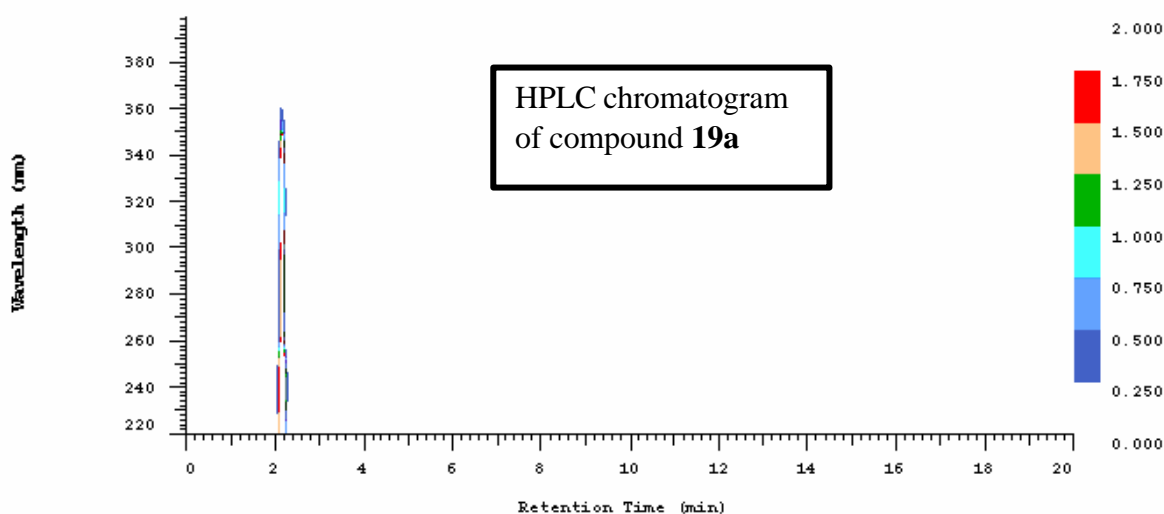

Chrom Type: Fixed WL Chromatogram, 270 nm

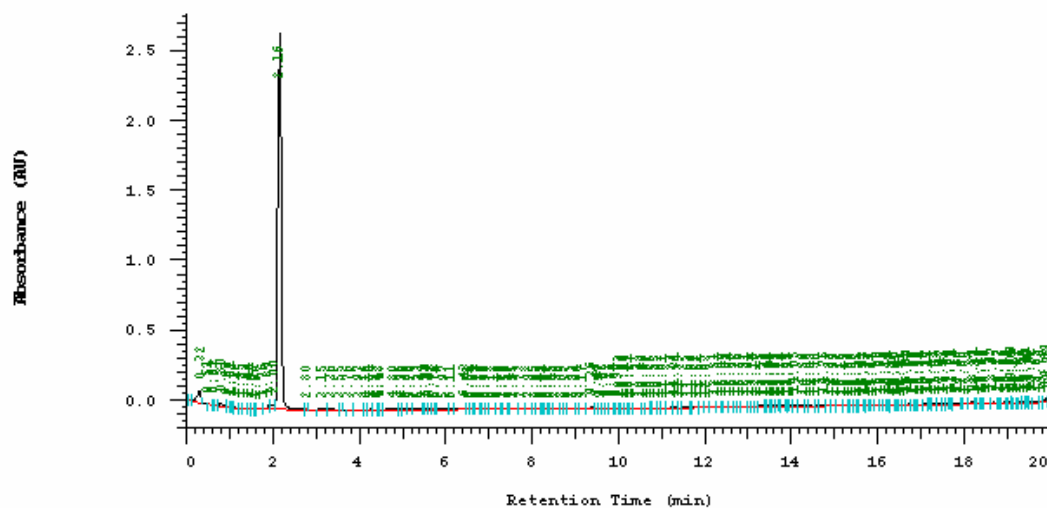

Acquisition Method: flourecent adenine derivatives

Column Type: LichroCART

Developed by: Avital

Pump A Type: L-6200

Solvent A: acetonitrile

Solvent B: TEAA

Method Description: 5mM TBAP in MeOH(A) amd 60 mM ammonium

**D-7000 HPLC System Manager Report**

Analyzed: 05/04/05 10:27

Reported: 24/04/06 16:52

Processed: 05/04/05 10:48

Data Path: C:\WIN32APP\HSM\EINAT\DATA\1691\

Processing Method: flourecent adenine derivatives

System(acquisition): Org.Chem-1

Series:1691

Application: EINAT

Vial Number: 1

Sample Name: ATP, N2, N3 2,3-Dimethoxy

Vial Type: UNK

Injection from this vial: 1 of 1

Volume: 20.0 ul

Sample Description:

Absorbance Mode: NORMAL (2.0 AU)

Absorbance Scale: 2.000

Spectral Bandwidth: 4 nm

Spectral Interval: 1600 ms

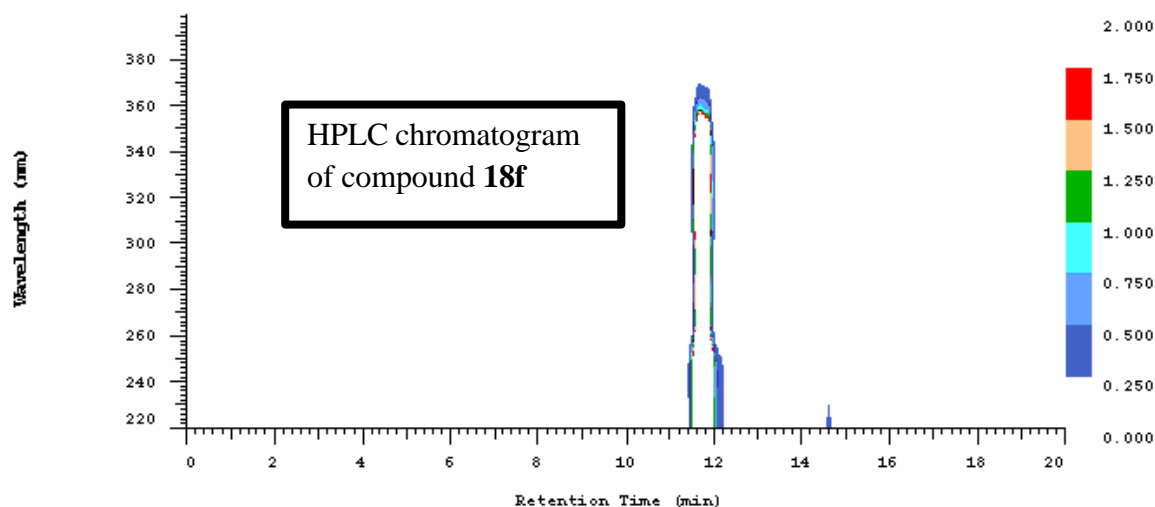

Chrom Type: Fixed WL Chromatogram, 270 nm

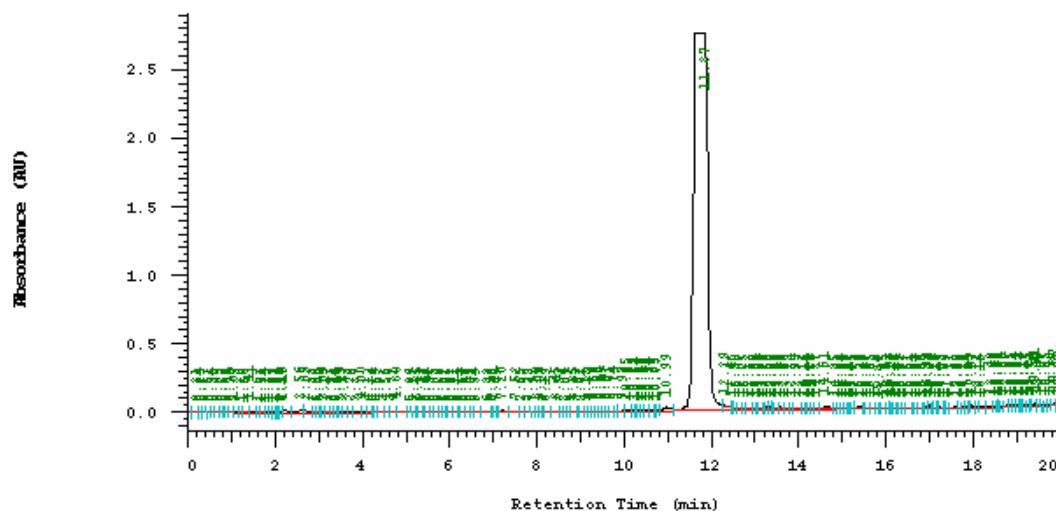

Acquisition Method: flourecent adenine derivatives

Column Type: LichroCART

Developed by: Avital

Pump A Type: L-6200

Solvent A: acetonitrile

Solvent B: TEAA

Method Description: 5mM TBAP in MeOH(A) and 60 mM ammonium

**D-7000 HPLC System Manager Report**

Analyzed: 05/04/05 14:24

Reported: 24/04/06 17:08

Processed: 05/04/05 14:44

Data Path: C:\WIN32APP\HSM\EINAT\DATA\1705\

Processing Method: flourecent adenine derivatives

System(acquisition): Org.Chem-1

Series:1705

Application: EINAT

Vial Number: 1

Sample Name: ATP,N2,N3 SMe

Vial Type: UNK

Injection from this vial: 1 of 1

Volume: 20.0 ul

Sample Description:

Absorbance Mode: NORMAL(2.0 AU)

Absorbance Scale: 2.000

Spectral Bandwidth: 4 nm

Spectral Interval: 1600 ms

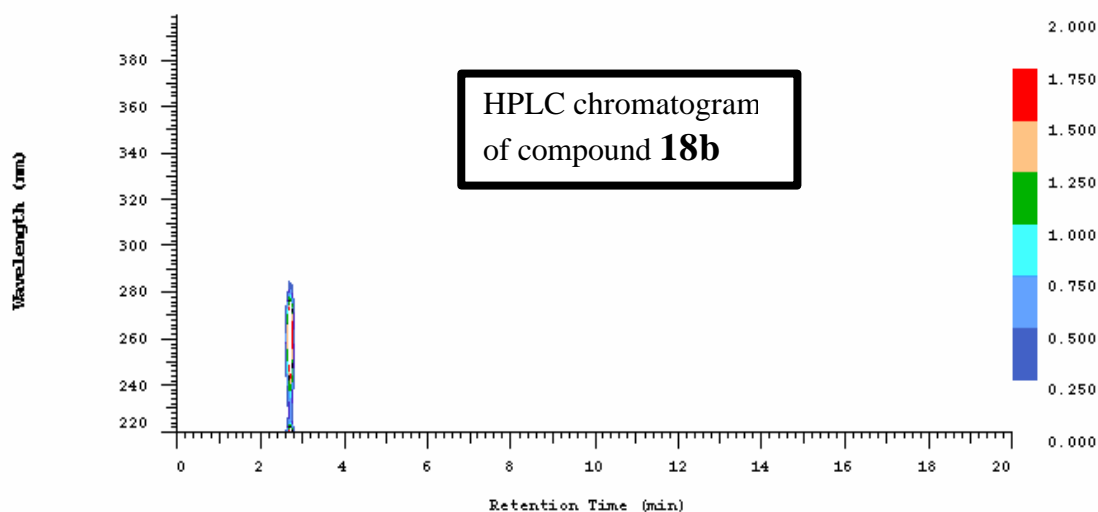

Chrom Type: Fixed WL Chromatogram, 270 nm

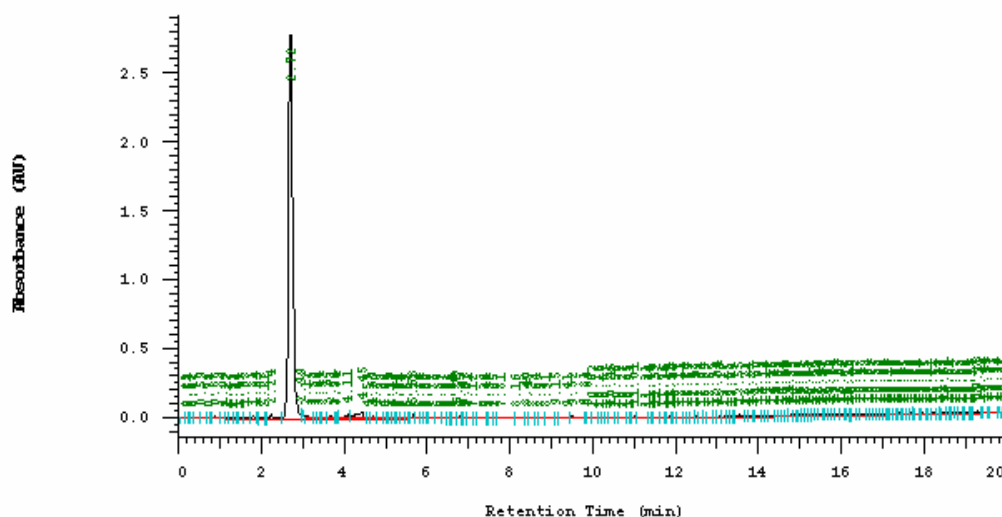

Acquisition Method: flourecent adenine derivatives

Column Type: LichroCART

Developed by: Avital

Pump A Type: L-6200

Solvent A: acetonitrile

Solvent B: TEAA

Method Description: 5mM TBAP in MeOH(A) and 60 mM ammonium

**D-7000 HPLC System Manager Report**

Analyzed: 05/04/05 12:16

Reported: 24/04/06 17:04

Processed: 05/04/05 12:36

Data Path: C:\WIN32APP\HSM\EINAT\DATA\1697\

Processing Method: flourecent adenine derivatives

System(acquisition): Org.Chem-1

Series:1697

Application: EINAT

Vial Number: 1

Sample Name: ATP,N2,N3 Guanosine

Vial Type: UNK

Injection from this vial: 1 of 1

Volume: 20.0 ul

Sample Description:

Absorbance Mode: NORMAL(2.0 AU)

Absorbance Scale: 2.000

Spectral Bandwidth: 4 nm

Spectral Interval: 1600 ms

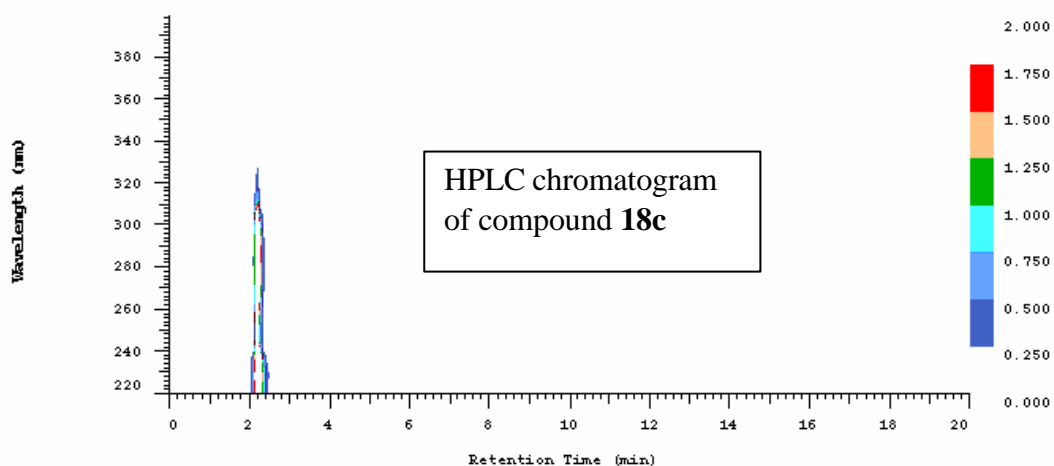

Chrom Type: Fixed WL Chromatogram, 270 nm

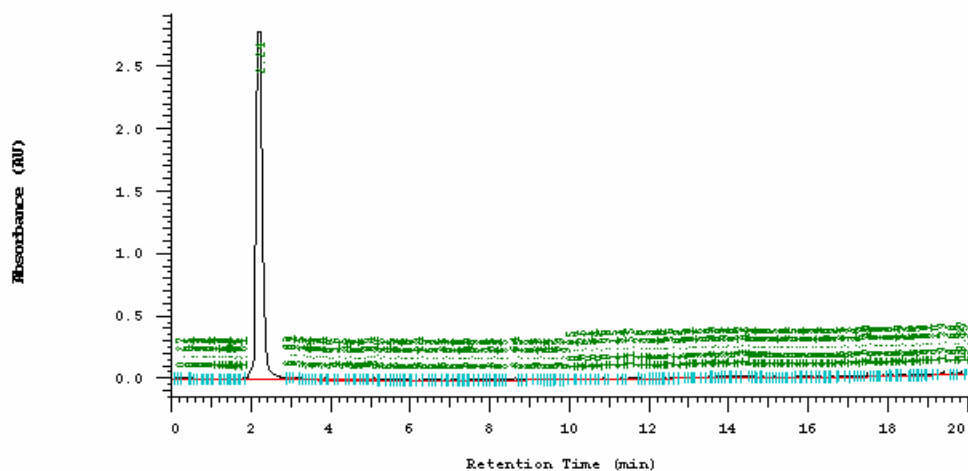

Acquisition Method: flourecent adenine derivatives

Column Type: LichroCART

Developed by: Avital

Pump A Type: L-6200

Solvent A: acetonitrile

Solvent B: TEAA

Method Description: 5mM TBAP in MeOH(A) amd 60 mM ammonium
